# Supplementary material for: Three-level hierarchical superhydrophobic Cu–Zn coating on a steel substrate without chemical modification for self-cleaning property
Source: Royal Society of Chemistry journal article supplement (doi:10.1039/c7nj00427c), 2017-01-01

Electronic Supplementary Material (ESI) for *New Journal of Chemistry*.

This journal is © The Royal Society of Chemistry and the Centre National de la Recherche Scientifique

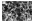

Supplement: c7nj00427c3.pdf [file c7nj00427c3.pdf]
