# Supplementary figures and images for: Three-level hierarchical superhydrophobic Cu–Zn coating on a steel substrate without chemical modification for self-cleaning property
Source: Royal Society of Chemistry journal article supplement (doi:10.1039/c7nj00427c), 2017-01-01

Sa = 1.38  $\mu\text{m}$

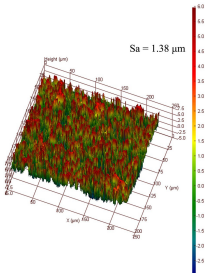

Supplement: c7nj00427c4.pdf [file c7nj00427c4.pdf]

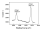

Supplement: c7nj00427c6.pdf [file c7nj00427c6.pdf]
